# Supplementary material
Source: PubMed Central journal article supplement (PMC5749415)
Supplement: NIHMS928248-supplement-Supplementary_Tables.pdf [file NIHMS928248-supplement-Supplementary_Tables.pdf]

### Supplementary Table 1

Identified INTRA-peptide BS<sup>3</sup> and CBDPS cross-links in isolated lipid-free, monomeric apoA-I samples derived from mixed <sup>14</sup>N and <sup>15</sup>N labeled proteins

| Cross-link | Peptides involved <sup>a</sup>        | Mod. <sup>b</sup>       | X-Linker                           | Peptide mass <sup>c</sup> |                 | Span                     |
|------------|---------------------------------------|-------------------------|------------------------------------|---------------------------|-----------------|--------------------------|
|            |                                       |                         |                                    | <sup>14</sup> N           | <sup>15</sup> N |                          |
| <i>Da</i>  |                                       |                         |                                    |                           |                 |                          |
| S87-K88    | 84-QEMSKDLEEVK-94                     | XL<br>-- <sup>d</sup>   | BS <sup>3</sup><br>-- <sup>d</sup> | 1472.72                   | 1486.68         | Intra<br>Intra           |
| K12-K23    | 11-VKDLATVYVDVLKDSGR-27               | XL                      | BS <sup>3</sup>                    | 2015.14                   | 2037.08         | Intra                    |
| S55-K59    | 46-LLDNWDSVTSTFSKLR-61                | XL                      | BS <sup>3</sup>                    | 2019.05                   | 2040.98         | Intra                    |
|            |                                       | XL                      | CBDPS                              | 2390.09                   | 2412.04         | Intra                    |
| K94-K96    | 89-DLEEV <b>KAKV</b> QPYLDDFQK-106    | XL                      | BS <sup>3</sup>                    | 2302.20                   | 2325.13         | Intra                    |
|            |                                       | XL                      | CBDPS                              | 2673.24                   | 2696.18         | Intra                    |
| K133-K140  | 132-QKLHELQEKL <b>S</b> PLGEEMR-149   | XL                      | BS <sup>3</sup>                    | 2302.22                   | 2329.14         | Intra                    |
|            |                                       | XL                      | CBDPS                              | 2673.26                   | 2700.18         | Intra                    |
| K206-K208  | 196-ATEHLSTLSE <b>KAK</b> PALEDLR-215 | XL                      | BS <sup>3</sup>                    | 2346.26                   | 2373.18         | Intra                    |
|            |                                       | XL                      | CBDPS                              | 2717.30                   | 2744.22         | Intra                    |
| K140-S142  | 132-QKLHELQEKL <b>S</b> PLGEEMR-149   | XL,H<br>-- <sup>d</sup> | BS <sup>3</sup><br>-- <sup>d</sup> | 2458.30                   | 2485.23         | Intra<br>-- <sup>d</sup> |
| S36-K40    | 28-DYVSQFEG <b>S</b> ALGKQLNLK-45     | -- <sup>d</sup>         | -- <sup>d</sup>                    |                           |                 | -- <sup>d</sup>          |
| K106-K107  | 97-VQPYLDDFQ <b>KKW</b> QEEMELYR-116  | XL                      | CBDPS                              | 2505.15                   | 2528.11         | Intra                    |
|            |                                       | -- <sup>d</sup>         | BS <sup>3</sup><br>-- <sup>d</sup> | 2782.36                   | 2811.28         | Intra<br>-- <sup>d</sup> |
| K52-K59    | 46-LLDNWDSVTSTFSKLR-61                | -- <sup>d</sup>         | -- <sup>d</sup>                    |                           |                 | -- <sup>d</sup>          |
|            |                                       | XL                      | CBDPS                              | 2390.09                   | 2412.04         | Intra                    |

<sup>a</sup> Lysines or serines involved in cross-links are in bold.

<sup>b</sup> Chemical modifications: XL = 1 complete cross-link (BS<sup>3</sup> +138.06808 Da, CBDPS +509.09682 Da), H = 1 hydrolyzed cross-linker (BS<sup>3</sup>: +156.07864 Da, CBDPS: +527.10738 Da).

<sup>c</sup> Experimentally derived monoisotopic mass for each peptide with each isotope and the combinations.

<sup>d</sup> Not detected. These ions were detectable in one sample set; for example CBDPS but not BS<sup>3</sup>.

## Supplementary Table 2

Identified INTER-peptide BS<sup>3</sup> and CBDPS cross-links in isolated lipid-free, monomeric apoA-I samples derived from mixed <sup>14</sup>N and <sup>15</sup>N labeled proteins

| Cross-link | Peptides involved <sup>a</sup> | Mod. <sup>b</sup> | X-Linker        | Peptide mass <sup>c</sup> |                 | Span            |
|------------|--------------------------------|-------------------|-----------------|---------------------------|-----------------|-----------------|
|            |                                |                   |                 | <sup>14</sup> N           | <sup>15</sup> N |                 |
| Da         |                                |                   |                 |                           |                 |                 |
| K118-K239  | 117-QKVEPLR-123                | XL                | BS <sup>3</sup> | 1608.93                   | 1628.87         | Intra           |
|            | 239-KLNTQ-243                  | XL                | CBDPS           | 1319.98                   | 1999.93         | Intra           |
| K94-K239   | 89-DLEEVKAK-96                 | XL                | BS <sup>3</sup> | 1670.93                   | 1688.88         | Intra           |
|            | 239-KLNTQ-243                  | XL                | CBDPS           | 2041.96                   | 2059.91         | Intra           |
| K133-K239  | 132-QKLHELQEK-140              | XL                | BS <sup>3</sup> | 1892.06                   | 1914.99         | Intra           |
|            | 239-KLNTQ-243                  | XL                | CBDPS           | 2263.09                   | 2286.03         | Intra           |
| K182-K239  | 178-LEALKENGGAR-188            | XL                | BS <sup>3</sup> | 1897.04                   | 1920.97         | Intra           |
|            | 239-KLNTQ-243                  | XL                | CBDPS           | 2268.08                   | 2292.01         | Intra           |
| NT-239     | -1-GDEPPQSPWDR-10              | XL                | BS <sup>3</sup> | 2022.98                   | 2046.92         | Intra           |
|            | 239-KLNTQ-243                  | XL                | CBDPS           | 2394.02                   | 2417.96         | Intra           |
| K118-S142  | 117-QKVEPLR-123                | XL                | BS <sup>3</sup> | 2037.11                   | 2061.04         | Intra           |
|            | 141-LSPLGEEMR-149              | XL                | CBDPS           | 2408.15                   | 2432.08         | Intra           |
| S167-K239  | 161-THLAPYSDELRL-171           | XL                | BS <sup>3</sup> | 2041.07                   | 2065.00         | Intra           |
|            | 239-KLNTQ-243                  | XL                | CBDPS           | 2412.13                   | 2432.09         | Intra           |
| S87-K239   | 84-QEMSKDLEEVK-94              | XL                | BS <sup>3</sup> | 2075.06                   | 2097.00         | Intra           |
|            | 239-KLNTQ-243                  | XL                | CBDPS           | 2446.10                   | 2468.04         | Intra           |
| K107-K239  | 107-KWQEEMELYR-116             | XL                | BS <sup>3</sup> | 2151.09                   | 2175.02         | Intra           |
|            | 239-KLNTQ-243                  | XL                | CBDPS           | 2522.13                   | 2546.06         | Intra           |
| K118-K133  | 117-QKVEPLR-123                | XL                | BS <sup>3</sup> | 2158.23                   | 2185.15         | Intra           |
|            | 132-QKLHELQEK-140              | XL                | CBDPS           | 2529.28                   | 2556.20         | Intra           |
| K118-K182  | 117-QKVEPLR-123                | XL                | BS <sup>3</sup> | 2163.23                   | 2191.15         | Intra           |
|            | 178-LEALKENGGAR-188            | XL                | CBDPS           | 2534.26                   | 2562.18         | Intra           |
| K96-K239   | 95-AKVQPYLDDFQK-106            | XL                | BS <sup>3</sup> | 2191.17                   | 2215.10         | Intra           |
|            | 239-KLNTQ-243                  | XL                | CBDPS           | 2562.21                   | 2586.14         | Intra           |
| K12-K239   | 11-VKDLATVYVDVLK-23            | XL                | BS <sup>3</sup> | 2202.27                   | 2225.21         | Intra           |
|            | 239-KLNTQ-243                  | -- <sup>d</sup>   | CBDPS           | -- <sup>d</sup>           | -- <sup>d</sup> | -- <sup>d</sup> |
| NT-K118    | -1-GDEPPQSPWDR-10              | XL                | BS <sup>3</sup> | 2289.16                   | 2317.08         | Intra           |
|            | 117-QKVEPLR-123                | XL                | CBDPS           | 2660.20                   | 2688.12         | Intra           |
| K182-K208  | 178-LEALKENGGAR-188            | XL                | BS <sup>3</sup> | 2306.28                   | 2335.20         | Intra           |
|            | 207-AKPALEDLR-215              | XL                | CBDPS           | 2677.28                   | 2706.20         | Intra           |
| NT-K94     | -1-GDEPPQSPWDR-10              | XL                | BS <sup>3</sup> | 2351.15                   | 2377.07         | Intra           |
|            | 89-DLEEVKAK-96                 | XL                | CBDPS           | 2722.19                   | 2748.13         | Intra           |
| S201-K208  | 196-ATEHLSTLSEK-206            | XL                | BS <sup>3</sup> | 2364.25                   | 2391.17         | Intra           |
|            | 207-AKPALEDLR-215              | XL                | CBDPS           | 2735.28                   | 2762.21         | Intra           |
| K107-K118  | 107-KWQEEMELYR-116             | XL                | BS <sup>3</sup> | 2417.26                   | 2445.18         | Intra           |
|            | 117-QKVEPLR-123                | XL                | CBDPS           | 2788.30                   | 2816.22         | Intra           |
| NT-K208    | -1-GDEPPQSPWDR-10              | XL                | BS <sup>3</sup> | 2432.22                   | 2461.13         | Intra           |
|            | 207-AKPALEDLR-215              | XL                | CBDPS           | 2803.25                   | 2832.17         | Intra           |
| K107-K208  | 107-KWQEEMELYR-116             | XL                | BS <sup>3</sup> | 2560.31                   | 2589.23         | Intra           |
|            | 207-AKPALEDLR-215              | XL                | CBDPS           | 2931.36                   | 2960.27         | Intra           |
| NT-K133    | -1-GDEPPQSPWDR-10              | XL                | BS <sup>3</sup> | 2572.27                   | 2603.19         | Intra           |
|            | 132-QKLHELQEK-140              | XL                | CBDPS           | 2943.32                   | 2974.23         | Intra           |
| NT-K182    | -1-GDEPPQSPWDR-10              | XL                | BS <sup>3</sup> | 2577.26                   | 2609.17         | Intra           |
|            | 178-LEALKENGGAR-188            | XL                | CBDPS           | 2948.31                   | 2980.21         | Intra           |
| K96-K208   | 95-AKVQPYLDDFQK-106            | XL                | BS <sup>3</sup> | 2600.40                   | 2629.32         | Intra           |
|            | 207-AKPALEDLR-215              | XL                | CBDPS           | 2971.45                   | 3000.37         | Intra           |
| S58-K239   | 46-LLDNWDSVTSTFSKLR-61         | XL                | BS <sup>3</sup> | 2621.39                   | 2651.30         | Intra           |
|            | 239-KLNTQ-243                  | XL                | CBDPS           | 2992.43                   | 3022.35         | Intra           |
| S59-K239   | 46-LLDNWDSVTSTFSKLR-61         | XL                | BS <sup>3</sup> | 2621.39                   | 2651.30         | Intra           |
|            | 239-KLNTQ-243                  | XL                | CBDPS           | 2992.44                   | 3022.35         | Intra           |
| K140-K239  | 134-LHELQEKLSPLGEEMR-149       | XL                | BS <sup>3</sup> | 2648.40                   | 2679.31         | Intra           |
|            | 239-KLNTQ-243                  | XL                | CBDPS           | 3019.45                   | 3050.35         | Intra           |
| K133-S142  | 132-QKLHELQEK-140              | -- <sup>d</sup>   | BS <sup>3</sup> | -- <sup>d</sup>           | -- <sup>d</sup> | -- <sup>d</sup> |
|            | 141-LSPLGEEMR-149              | XL                | CBDPS           | 2691.27                   | 2718.19         | Intra           |
| K107-K182  | 107-KWQEEMELYR-116             | XL                | BS <sup>3</sup> | 2705.36                   | 2737.28         | Intra           |
|            | 178-LEALKENGGAR-188            | XL                | CBDPS           | 3076.39                   | 3108.31         | Intra           |
| K40-K239   | 28-DYVYVQFEVSGALGKQLNLK-45     | XL                | BS <sup>3</sup> | 2736.45                   | 2767.36         | Intra           |
|            | 239-KLNTQ-243                  | -- <sup>d</sup>   | CBDPS           | -- <sup>d</sup>           | -- <sup>d</sup> | -- <sup>d</sup> |

|           |                                                         |                         |                          |                            |                            |                          |
|-----------|---------------------------------------------------------|-------------------------|--------------------------|----------------------------|----------------------------|--------------------------|
| K96-K182  | 95-AKVQPYLDDFQK-106<br>178-LEALKENGGAR-188              | XL<br>-- <sup>d</sup>   | BS <sup>3</sup><br>CBDPS | 2745.44<br>-- <sup>d</sup> | 2777.37<br>-- <sup>d</sup> | Intra<br>-- <sup>d</sup> |
| NT-K88    | -1-GDEPPQSPWDR-10<br>84-QEMSKDLEEVK-94                  | XL<br>XL                | BS <sup>3</sup><br>CBDPS | 2755.28<br>3126.32         | 2785.20<br>3156.25         | Intra<br>Intra           |
| K12-K182  | 11-VKDLATVYVDVVK-23<br>178-LEALKENGGAR-188              | XL<br>XL                | BS <sup>3</sup><br>CBDPS | 2756.55<br>3127.61         | 2787.46<br>3158.53         | Intra<br>Intra           |
| K107-S167 | 107-KWQEEMELR-116<br>161-THLAPYSDELRL-171               | -- <sup>d</sup><br>XL   | BS <sup>3</sup><br>CBDPS | -- <sup>d</sup><br>3220.44 | -- <sup>d</sup><br>3252.35 | -- <sup>d</sup><br>Intra |
| NT-K96    | -1-GDEPPQSPWDR-10<br>95-AKVQPYLDDFQK-106                | XL<br>XL                | BS <sup>3</sup><br>CBDPS | 2871.39<br>3242.44         | 2903.29<br>3274.30         | Intra<br>Intra           |
| NT-K12    | -1-GDEPPQSPWDR-10<br>11-VKDLATVYVDVVK-23                | XL<br>XL                | BS <sup>3</sup><br>CBDPS | 2882.49<br>3253.54         | 2913.40<br>3284.45         | Intra<br>Intra           |
| K96-S167  | 95-AKVQPYLDDFQK-106<br>161-THLAPYSDELRL-171             | XL<br>XL                | BS <sup>3</sup><br>CBDPS | 2889.47<br>3260.52         | 2921.38<br>3292.43         | Intra<br>Intra           |
| K118-K140 | 117-QKVEPLR-123<br>134-LHELQEKLSPLGEEMR-149             | XL<br>XL                | BS <sup>3</sup><br>CBDPS | 2914.59<br>3285.62         | 2949.48<br>3320.52         | Intra<br>Intra           |
| K88-K96   | 84-QEMSKDLEEVK-94<br>95-AKVQPYLDDFQK-106                | XL<br>XL                | BS <sup>3</sup><br>CBDPS | 2923.47<br>3294.51         | 2953.38<br>3324.46         | Intra<br>Intra           |
| S167-K182 | 161-THLAPYSDELRL-171<br>178-LEALKENGGAR-188             | -- <sup>d</sup><br>XL   | BS <sup>3</sup><br>CBDPS | -- <sup>d</sup><br>2966.39 | -- <sup>d</sup><br>2998.30 | -- <sup>d</sup><br>Intra |
| K96-K107  | 95-AKVQPYLDDFQK-106<br>107-KWQEEMELR-116                | XL<br>XL                | BS <sup>3</sup><br>CBDPS | 2999.50<br>3370.54         | 3031.40<br>3402.45         | Intra<br>Intra           |
| K40-K118  | 28-DYVSQLFEGSALGKQLNLK-45<br>117-QKVEPLR-123            | XL<br>-- <sup>d</sup>   | BS <sup>3</sup><br>CBDPS | 3002.64<br>-- <sup>d</sup> | 3037.52<br>-- <sup>d</sup> | Intra<br>-- <sup>d</sup> |
| K208-K239 | 196-ATEHLSTLSEKAKPALEDLR-215<br>239-KLNTQ-243           | XL,H<br>-- <sup>d</sup> | BS <sup>3</sup><br>CBDPS | 3104.66<br>-- <sup>d</sup> | 3139.56<br>-- <sup>d</sup> | Intra<br>-- <sup>d</sup> |
| K195-K208 | 189-LAEYHAKATEHLSTLSEK-206<br>207-AKPALEDLR-215         | XL<br>XL                | BS <sup>3</sup><br>CBDPS | 3176.69<br>3547.74         | 3213.59<br>3584.64         | Intra<br>Intra           |
| K40-K133  | 28-DYVSQLFEGSALGKQLNLK-45<br>132-QKLHELQEK-140          | XL<br>-- <sup>d</sup>   | BS <sup>3</sup><br>CBDPS | 3285.75<br>-- <sup>d</sup> | 3323.64<br>-- <sup>d</sup> | Intra<br>-- <sup>d</sup> |
| NT-K59    | -1-GDEPPQSPWDR-10<br>46-LLDNWDSVTSTFSKLR-61             | XL<br>XL                | BS <sup>3</sup><br>CBDPS | 3301.62<br>3672.66         | 3339.50<br>3710.55         | Intra<br>Intra           |
| NT-K140   | -1-GDEPPQSPWDR-10<br>134-LHELQEKLSPLGEEMR-149           | XL,H<br>-- <sup>d</sup> | BS <sup>3</sup><br>CBDPS | 3740.87<br>-- <sup>d</sup> | 3783.75<br>-- <sup>d</sup> | Intra<br>-- <sup>d</sup> |
| S204-K208 | 189-LAEYHAKATEHLSTLSEK-206<br>207-AKPALEDLR-215         | XL,H<br>-- <sup>d</sup> | BS <sup>3</sup><br>CBDPS | 3332.78<br>-- <sup>d</sup> | 3369.67<br>-- <sup>d</sup> | Intra<br>Intra           |
| K226-K239 | 216-QGLLPVLESFKVSFLSALEEYTK-238<br>239-KLNTQ-243        | XL<br>-- <sup>d</sup>   | BS <sup>3</sup><br>CBDPS | 3337.83<br>-- <sup>d</sup> | 3371.75<br>-- <sup>d</sup> | Intra<br>-- <sup>d</sup> |
| K77-K239  | 62-EQLGPVTQEFWDNLEKETEGRL-83<br>239-KLNTQ-243           | XL<br>XL                | BS <sup>3</sup><br>CBDPS | 3357.70<br>3728.74         | 3395.59<br>3766.62         | Intra<br>Intra           |
| NT-K23    | -1-GDEPPQSPWDR-10<br>11-VKDLATVYVDVVKDSGR-27            | XL,H<br>-- <sup>d</sup> | BS <sup>3</sup><br>CBDPS | 3453.76<br>-- <sup>d</sup> | 3491.66<br>-- <sup>d</sup> | Intra<br>-- <sup>d</sup> |
| K118-K226 | 117-QKVEPLR-123<br>216-QGLLPVLESFKVSFLSALEEYTK-238      | XL<br>-- <sup>d</sup>   | BS <sup>3</sup><br>CBDPS | 3604.01<br>-- <sup>d</sup> | 3641.90<br>-- <sup>d</sup> | Intra<br>-- <sup>d</sup> |
| K77-K182  | 62-EQLGPVTQEFWDNLEKETEGRL-83<br>178-LEALKENGGAR-188     | XL<br>XL                | BS <sup>3</sup><br>CBDPS | 3911.98<br>4283.03         | 3957.85<br>4328.88         | Intra<br>Intra           |
| NT-K77    | -1-GDEPPQSPWDR-10<br>62-EQLGPVTQEFWDNLEKETEGRL-83       | XL<br>XL                | BS <sup>3</sup><br>CBDPS | 4037.93<br>4408.97         | 4083.79<br>4454.83         | Intra<br>Intra           |
| K77-K88   | 62-EQLGPVTQEFWDNLEKETEGRL-83<br>84-QEMSKDLEEVK-94       | XL<br>XL                | BS <sup>3</sup><br>CBDPS | 4090.01<br>4461.03         | 4133.88<br>4504.91         | Intra<br>Intra           |
| K40-K140  | 28-DYVSQLFEGSALGKQLNLK-45<br>132-QKLHELQEKLSPLGEEMR-149 | XL,H<br>-- <sup>d</sup> | BS <sup>3</sup><br>CBDPS | 4454.36<br>-- <sup>d</sup> | 4504.22<br>-- <sup>d</sup> | Intra<br>-- <sup>d</sup> |

<sup>a</sup> Lysines involved in cross-links are in bold.

<sup>b</sup> Chemical modifications: XL = 1 complete cross-link (BS<sup>3</sup> +138.06808 Da, CBDPS +509.09682 Da), H = 1 hydrolyzed cross-linker (BS<sup>3</sup>: +156.07864 Da, CBDPS: +527.10738 Da).

<sup>c</sup> Experimentally derived monoisotopic mass for each peptide with each isotope and the combinations.

<sup>d</sup> Not detected. These ions were detectable in one sample set; for example CBDPS but not BS<sup>3</sup>.

**Supplementary Table 3***Experimental parameters from SAXS sampling of monomeric apoA-I cross-linked with CBDPS or BS3*

| <b>ApoA-I<br/>Sample</b> | <b>I(O)<sup>a</sup><br/>(Guinier)</b> | <b>R<sub>g</sub><sup>b</sup><br/>(Guinier)</b> | <b>Real<br/>Space R<sub>g</sub></b> | <b>D<sub>max</sub><sup>c</sup></b> | <b>Volume</b>        | <b>DAMMIF<br/>NSD<sup>d</sup></b> |
|--------------------------|---------------------------------------|------------------------------------------------|-------------------------------------|------------------------------------|----------------------|-----------------------------------|
|                          | <b>cm<sup>-1</sup></b>                | <b>Å</b>                                       | <b>Å</b>                            | <b>Å</b>                           | <b>Å<sup>3</sup></b> | <b>Å</b>                          |
| <b>CBDPS</b>             |                                       |                                                |                                     |                                    |                      |                                   |
| 4.0 mg/ml                | 603                                   | 26                                             | 25.29                               | 85                                 | 70165                |                                   |
| 2.0 mg/ml                | 301                                   | 25.8                                           | 25.24                               | 83                                 | 68091                | 0.579 ± 0.032                     |
| 1.0 mg/ml                | 149                                   | 25.1                                           | 25.53                               | 83                                 | 70191                |                                   |
| <b>BS<sup>3</sup></b>    |                                       |                                                |                                     |                                    |                      |                                   |
| 4.0 mg/ml                | 569                                   | 25.95                                          | 25.54                               | 88                                 | 77337                |                                   |
| 2.0 mg/ml                | 294                                   | 25.58                                          | 25.25                               | 81                                 | 77334                | 0.596 ± 0.024                     |
| 1.0 mg/ml                | 140                                   | 27.67                                          | 25.24                               | 81                                 | 83946                |                                   |

**Supplementary Table 4**  
*Universal cross-linking list across four studies on lipid-free monomeric apoA-I*

| Residue<br>1 | Residue<br>2 | Reported <sup>a</sup> |               |               |          | Cross-Linker <sup>b</sup> |     |       | Distance <sup>c</sup><br>(Å) |
|--------------|--------------|-----------------------|---------------|---------------|----------|---------------------------|-----|-------|------------------------------|
|              |              | Silva et al           | Pollard et al | Segrest et al | Melchior | MDA                       | BS3 | CBDPs |                              |
| 1            | 12           |                       | X             | X             | X        | X                         | X   | X     | 23                           |
| 1            | 23           |                       |               |               | X        |                           | X   |       | 28                           |
| 1            | 59           |                       | X             |               | X        |                           | X   | X     | 28                           |
| 1            | 77           |                       |               |               | X        |                           | X   | X     | 28                           |
| 1            | 88           |                       |               |               | X        |                           | X   | X     | 28                           |
| 1            | 94           |                       |               |               | X        |                           | X   | X     | 28                           |
| 1            | 96           | X                     |               |               | X        |                           | X   | X     | 28                           |
| 1            | 118          |                       | X             |               | X        |                           | X   | X     | 28                           |
| 1            | 133          |                       |               |               | X        |                           | X   | X     | 28                           |
| 1            | 140          |                       |               |               | X        |                           | X   |       | 28                           |
| 1            | 182          |                       |               |               | X        |                           | X   | X     | 28                           |
| 1            | 195          |                       |               | X             |          | X                         |     |       | 23                           |
| 1            | 208          |                       |               |               | X        |                           | X   | X     | 28                           |
| 1            | 239          |                       |               |               | X        |                           | X   | X     | 28                           |
| 12           | 23           | X                     | X             | X             | X        | X                         | X   | X     | 23                           |
| 12           | 182          |                       |               |               | X        |                           | X   | X     | 28                           |
| 12           | 195          |                       | X             |               |          |                           |     |       | 28                           |
| 12           | 226          |                       |               | X             |          | X                         |     |       | 23                           |
| 12           | 239          |                       |               |               | X        |                           | X   |       | 28                           |
| 23           | 59           | X                     | X             | X             | X        | X                         |     |       | 23                           |
| 23           | 239          |                       |               | X             |          | X                         |     |       | 23                           |
| 36           | 40           |                       |               |               | X        |                           | X   | X     | 28                           |
| 40           | 45           | X                     | X             | X             |          | X                         |     |       | 23                           |
| 40           | 59           |                       | X             |               |          |                           |     |       | 28                           |
| 40           | 94           |                       |               | X             |          | X                         |     |       | 23                           |
| 40           | 118          |                       | X             |               | X        |                           | X   |       | 28                           |
| 40           | 133          |                       | X             | X             | X        | X                         | X   |       | 23                           |
| 40           | 140          |                       | X             |               | X        |                           | X   |       | 28                           |
| 40           | 182          |                       | X             |               |          |                           |     |       | 28                           |
| 40           | 239          |                       | X             | X             | X        | X                         | X   |       | 23                           |
| 45           | 59           |                       | X             |               |          |                           |     |       | 28                           |
| 52           | 59           |                       |               |               | X        |                           | X   | X     | 28                           |
| 55           | 59           |                       |               |               | X        |                           | X   | X     | 28                           |
| 58           | 239          |                       |               |               | X        |                           | X   | X     | 28                           |
| 59           | 195          |                       |               | X             |          | X                         |     |       | 23                           |
| 59           | 239          |                       |               | X             | X        | X                         | X   | X     | 23                           |
| 77           | 88           |                       |               |               | X        |                           | X   | X     | 28                           |
| 77           | 182          |                       |               |               | X        |                           | X   | X     | 28                           |
| 77           | 195          |                       |               | X             |          | X                         |     |       | 23                           |
| 77           | 208          |                       |               | X             |          | X                         |     |       | 23                           |
| 77           | 239          |                       |               |               | X        |                           | X   | X     | 28                           |
| 87           | 88           |                       |               |               | X        |                           | X   |       | 28                           |
| 87           | 239          |                       |               |               | X        |                           | X   | X     | 28                           |
| 88           | 94           | X                     | X             |               |          |                           |     |       | 28                           |
| 88           | 96           |                       |               |               | X        |                           | X   | X     | 28                           |
| 88           | 118          |                       | X             |               |          |                           |     |       | 28                           |
| 88           | 195          |                       |               | X             |          | X                         |     |       | 23                           |
| 94           | 96           | X                     | X             | X             | X        | X                         | X   | X     | 23                           |
| 94           | 226          |                       |               | X             |          | X                         |     |       | 23                           |
| 94           | 239          |                       | X             | X             | X        | X                         | X   | X     | 23                           |
| 96           | 106          | X                     | X             |               |          |                           |     |       | 28                           |
| 96           | 107          |                       |               |               | X        |                           | X   | X     | 28                           |
| 96           | 167          |                       |               |               | X        |                           | X   | X     | 28                           |
| 96           | 182          |                       |               |               | X        |                           | X   |       | 28                           |
| 96           | 195          | X                     |               | X             |          | X                         |     |       | 23                           |
| 96           | 208          | X                     |               | X             | X        | X                         | X   | X     | 23                           |
| 96           | 226          | X                     |               |               |          |                           |     |       | 28                           |

|     |     |   |   |   |   |   |   |   |    |
|-----|-----|---|---|---|---|---|---|---|----|
| 96  | 239 |   |   | X | X | X | X | X | 23 |
| 106 | 107 | X |   | X | X | X | X | X | 23 |
| 107 | 118 |   |   |   | X |   | X | X | 28 |
| 107 | 167 |   |   |   | X |   |   | X | 28 |
| 107 | 182 |   |   |   | X |   | X | X | 28 |
| 107 | 208 |   |   |   | X |   | X | X | 28 |
| 107 | 239 |   |   | X | X | X | X | X | 23 |
| 118 | 133 |   | X | X | X | X | X | X | 23 |
| 118 | 140 | X | X | X | X | X | X | X | 23 |
| 118 | 142 |   |   |   | X |   | X | X | 28 |
| 118 | 182 |   |   |   | X |   | X | X | 28 |
| 118 | 195 |   |   | X |   | X |   |   | 23 |
| 118 | 208 |   |   | X |   | X |   |   | 23 |
| 118 | 226 |   |   | X | X | X | X |   | 23 |
| 118 | 239 |   |   | X | X | X | X | X | 23 |
| 133 | 140 | X | X | X | X | X | X | X | 23 |
| 133 | 142 |   |   |   | X |   | X |   | 28 |
| 133 | 239 |   |   | X | X | X | X | X | 23 |
| 140 | 142 |   |   |   | X |   | X | X | 28 |
| 140 | 239 |   |   | X | X | X | X | X | 23 |
| 167 | 182 |   |   |   | X |   |   | X | 28 |
| 167 | 239 |   |   |   | X |   | X | X | 28 |
| 182 | 195 |   |   | X |   | X |   |   | 23 |
| 182 | 208 |   |   |   | X |   | X | X | 28 |
| 182 | 226 |   |   | X |   | X |   |   | 23 |
| 182 | 239 |   |   |   | X |   | X | X | 28 |
| 195 | 206 |   |   | X |   | X |   |   | 23 |
| 195 | 208 |   |   |   | X |   | X | X | 28 |
| 195 | 226 |   |   | X |   | X |   |   | 23 |
| 195 | 239 |   |   | X |   | X |   |   | 23 |
| 201 | 208 |   |   |   | X |   | X | X | 28 |
| 204 | 208 |   |   |   | X |   | X |   | 28 |
| 206 | 208 | X | X | X | X | X | X | X | 23 |
| 206 | 226 |   |   | X |   | X |   |   | 23 |
| 208 | 239 |   |   |   | X |   | X |   | 28 |
| 226 | 238 | X |   |   |   |   |   |   | 28 |
| 226 | 239 |   |   | X | X | X | X |   | 23 |
| 238 | 239 | X | X | X |   | X |   |   | 23 |

<sup>a</sup> Cross-linked residues reported in the current study or Silva et al <sup>1</sup>, Pollard et al <sup>2</sup>, or Segrest et al <sup>3</sup>.

<sup>b</sup> Cross-link found with cross-linking reagent

<sup>c</sup> Upper-limit Ca-Ca distance used as cross-linking constraint for consensus model

**Supplementary Table 5***Reported structural features of lipid-free monomeric apoA-I determined by far circular dichroism*

| Author           | Year | A-I Source        | [PRO] mg/ml | Temp (°C) | Alpha          | Beta-Sheet | Coil/ Turns    | Ref             |
|------------------|------|-------------------|-------------|-----------|----------------|------------|----------------|-----------------|
| Davidson et al   | 1996 | Plasma            | 0.05-0.1    | 25        | 57.0%          |            | 43.0%          | <sup>4</sup>    |
| Bergeron et al   | 1997 | Native His-apoA-I | 0.067       | 24        | 56.0%<br>50.0% |            | 44.0%<br>50.0% | 5 a             |
| Rogers et al     | 1998 | Plasma            | 0.01-0.56   | 25        | 68.0%          |            | 32.0%          | <sup>6 b</sup>  |
| Sparks et al     | 1999 | Plasma            | 0.067       | 24        | 49.0%          |            | 51.0%          | <sup>7 c</sup>  |
| Suurkuusk et al  | 1999 | Plasma            | 0.1         | 25        | 44.0%          |            | 56.0%          | <sup>8 d</sup>  |
| Davidson et al   | 1999 | Pro-apoA-I        | 0.05-0.1    | 25        | 56.0%          |            | 44.0%          | <sup>9 d</sup>  |
| Huang et al      | 2000 | Pro-apoA-I        | 0.1         | 25        | 45.0%          |            | 55.0%          | <sup>10</sup>   |
| Panzenbock et al | 2000 | Plasma            | 0.1         | 25        | 52.0%          | 7.9%       | 37.3%          | <sup>11</sup>   |
| Weinberg et al   | 2000 | Plasma            | 0.08        | 25        | 54.0%          |            | 46.0%          | <sup>12</sup>   |
| Sigalov et al    | 2001 | Plasma            | 0.1         | 25        | 62.0%          |            | 38.0%          | <sup>13</sup>   |
| Gorshkova et al  | 2002 | Pro-apoA-I        | 0.025-0.1   | 25        | 58.0%          |            | 42.0%          | <sup>14 d</sup> |
| Reschly et al    | 2002 | Plasma            | 0.1         | 25        | 40.0%          |            | 60.0%          | <sup>15</sup>   |
| Saito et al      | 2003 | Plasma r-apoA-I   | 0.025-0.05  | 25        | 49.0%<br>46.0% |            | 51.0%<br>54.0% | <sup>16 e</sup> |
| Fang et al       | 2003 | Plasma r-apoA-I   | 0.06-0.1    | 25        | 60.0%<br>55.0% |            | 40.0%<br>45.0% | <sup>17 f</sup> |
| Saito et al      | 2004 | Plasma r-apoA-I   | 0.025       | 25        | 46.0%<br>44.0% |            | 54.0%<br>56.0% | <sup>18 e</sup> |
| Han et al        | 2005 | r-apoA-I          | 0.07        | 25        | 52.0%          |            | 48.0%          | <sup>19 d</sup> |
| Silva et al      | 2005 | Plasma            | 0.03        | 25        | 55.0%          | 8.0%       | 37%            | <sup>1</sup>    |
| Zhu et al        | 2005 | His-apoA-I        | 0.06-0.1    | 25        | 54.0%          |            | 46.0%          | <sup>20 a</sup> |
| Arnulphi et al   | 2005 | Plasma            | 0.054       | 15<br>37  | 48.0%<br>50.0% |            | 52.0%<br>50.0% | <sup>21</sup>   |
| Gorshkova et al  | 2006 | Pro-apoA-I        | 0.025-0.08  | 25        | 58.0%<br>59.0% |            | 42.0%<br>41.0% | <sup>22 g</sup> |
| Tanaka et al     | 2008 | r-apoA-I          | 0.05        | 25        | 44.0%          |            | 56.0%          | <sup>23 d</sup> |
| Fukuda et al     | 2008 | Plasma            | 0.06        | 37        | 44.0%          |            | 56.0%          | <sup>24</sup>   |
| Kono et al       | 2009 | r-apoA-I          | 0.03-0.05   |           | 46.0%          |            | 54.0%          | <sup>25 d</sup> |
| Chetty et al     | 2009 | Plasma            | 0.05        | 25        | 49.0%          |            | 51.0%          | <sup>26</sup>   |
| Jayaraman et al  | 2012 | Plasma            | 0.02        | 25        | 57.0%          |            | 43.0%          | <sup>27</sup>   |
| Zehender et al   | 2012 | r-apoA-I          | 0.1         | 25        | 45.0%          |            | 55.0%          | <sup>28 h</sup> |
| Della-Riva et al | 2013 | r-apoA-I          | 0.1         | 25        | 56.0%          |            | 44.0%          | <sup>29 i</sup> |

<sup>a</sup> Studies performed on recombinant human apoA-I which contains Met-Arg-Gly-Ser-(His)<sub>6</sub> on the NT

<sup>b</sup> CD was obtained on a range of values that both fall within and exceed concentrations reported for monomeric apoA-I .

<sup>c</sup> The source of apoA-I is unclear. "Lyophilized apoA-I (purity > 96%) were purchased from Biogenesis."

<sup>d</sup> Studies performed on recombinant human proapoA-I which contains a hexapeptide on the NT normally cleaved when secreted into plasma.

<sup>e</sup> Studies performed on recombinant human apoA-I which containing a Gly-Ser, on the NT.

<sup>f</sup> Studies performed on recombinant human apoA-I containing a Gly-Ala-Met-Gly-Ser, on the NT.

<sup>g</sup> Studies performed on recombinant human proapoA-I containing a hexapeptide on the NT normally cleaved when secreted into plasma. Protein was expressed in either a baculovirus (top) or adenovirus (bottom) system.

<sup>h</sup> Studies performed on recombinant human apoA-I containing a Gly-Gly on the NT.

<sup>i</sup> Studies performed on recombinant human apoA-I which contains a point mutation, E2D at the N-terminus.



### Supplementary Table 6

*Reported cleavage sites on lipid-free monomeric apoA-I determined by limited proteolysis*

| Author        | Year | A-I Source | [PRO] mg/ml | Temp (°C) | Proteolytic Enzyme | Cleavage Sites                                                   | Ref           |
|---------------|------|------------|-------------|-----------|--------------------|------------------------------------------------------------------|---------------|
| Roberts et al | 1997 | Plasma     | 0.1         | 37        | a,b                | Y115, E125, E136, E191, Y192, L200, L211, E212, E223, F225, E235 | <sup>30</sup> |
| Rogers et al  | 1997 | Plasma     | 0.1         | 37        | a                  | F57, L122, Y192                                                  | <sup>31</sup> |

<sup>a</sup> Chymotrypsin: Cleaves at the carboxy-terminal side of Tyrosine (Tyr, Y), Phenalanine (Phe, F), Tryptophan (Trp,W), and Leucine (Leu, L).

<sup>b</sup> *S. Aureus* V8 protease: Cleaves at the carboxy-terminal side of glutamic acid (Glu, E) residues

### Supplementary Table 7

*Reported molecular dimensions for lipid-free monomeric apoA-I measured by sedimentation velocity*

| <b>Author</b>          | <b>Year</b> | <b>A-I Source</b> | <b>[PRO] mg/ml</b> | <b>Length (Å)</b> | <b>Width (Å)</b> | <b>Axial Ratio</b> | <b>Ref</b>    |
|------------------------|-------------|-------------------|--------------------|-------------------|------------------|--------------------|---------------|
| <b>Barbeau et al</b>   | 1979        | Plasma            | 0.05-0.7           | 151.2             | 25.2             | 6.0                | <sup>32</sup> |
| <b>Edelstein et al</b> | 1980        | Plasma            | 0.05               | 164               | 25               | 6.6                | <sup>33</sup> |
| <b>Rogers et al</b>    | 1998        | Plasma            | 0.1-0.2            | 168               | 24               | 7.2                | <sup>31</sup> |
